# Supplementary material for: Bilateral Asymmetry of Spatiotemporal Running Gait Parameters in U14 Athletes at Different Speeds
Source: MDPI journal article supplement (doi:10.3390/sports12050117), 2024-04-27
Supplement: s1 [file s1]

# Supplementary Materials:

**Table S1:** Summary results of all running variables reported by the RunScribe system. Mean values (right and left), reliability data and mean bilateral asymmetry (%) for each kinematic variable at 12 and 14 km·h<sup>-1</sup>. Results of inter-limb paired t-tests for all parameters of interest at both speeds.

| Variables                 | Leg   | 12km·h <sup>-1</sup> |        |        |              | 14km·h <sup>-1</sup> |        |        |         |
|---------------------------|-------|----------------------|--------|--------|--------------|----------------------|--------|--------|---------|
|                           |       | Mean (SD)            | CV (%) | BA (%) | p-value (ES) | Mean (SD)            | CV (%) | BA (%) | p-value |
| LSS (kN.m <sup>-1</sup> ) | Right | 7.6 ± 1.3            | 7.5    | 4.8    | 0.368        | 7.6 ± 1.3            | 10.7   | 5.7    | 0.888   |
|                           | Left  | 7.6 ± 1.4            | 7.6    |        |              | 7.6 ± 1.2            | 7.9    |        |         |
| VSS (kN.m <sup>-1</sup> ) | Right | 16.4 ± 1.3           | 3.4    | 1.5    | 0.706        | 17.8 ± 1.5           | 3.6    | 1.9    | 0.648   |
|                           | Left  | 16.3 ± 1.4           | 3.1    |        |              | 17.8 ± 1.5           | 3.4    |        |         |
| FSP (a. u.)               | Right | 7.6 ± 3.0            | 21.8   | 13.4   | 0.790        | 7.4 ± 3.0            | 20.8   | 15.4   | 0.707   |
|                           | Left  | 7.7 ± 2.7            | 20.3   |        |              | 7.3 ± 2.6            | 19.3   |        |         |
| SA (°)                    | Right | 2.2 ± 0.9            | 20.4   | 10.8   | 0.307        | 2.4 ± 0.9            | 18.2   | 10.1   | 0.932   |
|                           | Left  | 2.1 ± 0.9            | 21.2   |        |              | 2.4 ± 0.8            | 17.5   |        |         |
| PExc                      | Right | -14.3 ± 5.9          | 19.6   | 14.5   | 0.648        | -15.7 ± 6.0          | 20.1   | 22.5   | 0.890   |
|                           | Left  | -13.9 ± 4.6          | 18.0   |        |              | -15.6 ± 4.9          | 19.0   |        |         |
| MPV                       | Right | 771 ± 233            | 19.1   | 20.4   | 0.019* (0.4) | 951 ± 251            | 18.9   | 16.6   | 0.131   |
|                           | Left  | 683 ± 186            | 20.9   |        |              | 893 ± 238            | 18.9   |        |         |
| t <sub>(FSaMPV)</sub>     | Right | 19.0 ± 6.5           | 26.9   | 20.9   | 0.445        | 20.2 ± 6.4           | 25.6   | 18.7   | 0.451   |
|                           | Left  | 18.1 ± 5.5           | 28.2   |        |              | 19.5 ± 6.5           | 28.5   |        |         |
| t <sub>(MPVaMP)</sub>     | Right | 33.1 ± 9.7           | 22.4   | 18.2   | 0.183        | 28.3 ± 7.8           | 27.0   | 17.7   | 0.577   |
|                           | Left  | 35.0 ± 9.9           | 23.0   |        |              | 29.0 ± 7.2           | 23.4   |        |         |
| t <sub>(MPaTO)</sub>      | Right | 195.4 ± 19.0         | 4.8    | 2.9    | 0.748        | 180.6 ± 16.5         | 4.9    | 2.8    | 0.869   |
|                           | Left  | 195.0 ± 17.3         | 4.9    |        |              | 180.4 ± 13.7         | 4.4    |        |         |
| Shock                     | Right | 14.7 ± 1.3           | 9.7    | 5.6    | 0.520        | 15.1 ± 1.6           | 10.0   | 7.2    | 0.333   |
|                           | Left  | 14.8 ± 1.5           | 9.9    |        |              | 15.4 ± 1.6           | 10.2   |        |         |
| Impact                    | Right | 9.4 ± 2.9            | 22.1   | 12.6   | 0.122        | 9.8 ± 3.3            | 20.5   | 17.2   | 0.136   |
|                           | Left  | 9.8 ± 3.1            | 22.2   |        |              | 10.5 ± 3.1           | 19.7   |        |         |
| Braking                   | Right | 10.6 ± 1.9           | 15.8   | 8.0    | 0.372        | 10.8 ± 1.8           | 16.5   | 9.0    | 0.500   |
|                           | Left  | 10.4 ± 1.6           | 16.2   |        |              | 10.6 ± 1.5           | 18.6   |        |         |
| Peak VGRF                 | Right | 3.5 ± 0.4            | 5.4    | 3.2    | 0.375        | 3.8 ± 0.5            | 5.5    | 3.3    | 0.863   |
|                           | Left  | 3.5 ± 0.4            | 5.5    |        |              | 3.8 ± 0.4            | 5.3    |        |         |
| VGRF Rate                 | Right | 39.9 ± 2.7           | 3.0    | 2.1    | 0.478        | 43.0 ± 2.8           | 3.0    | 2.2    | 0.790   |
|                           | Left  | 39.7 ± 2.7           | 3.0    |        |              | 43.0 ± 2.5           | 3.0    |        |         |
| HGRF Rate                 | Right | 7.3 ± 0.4            | 3.8    | 1.6    | 0.248        | 8.6 ± 0.4            | 3.9    | 1.4    | 0.569   |
|                           | Left  | 7.3 ± 0.4            | 4.2    |        |              | 8.6 ± 0.4            | 4.0    |        |         |
| Total F Rate              | Right | 107.4 ± 4.0          | 2.7    | 1.0    | 0.206        | 121.2 ± 4.9          | 2.9    | 0.9    | 0.456   |
|                           | Left  | 107.7 ± 4.1          | 2.9    |        |              | 121.0 ± 4.8          | 3.0    |        |         |

\*p<0.05; SD: Standard deviation; ES: Effect size; CV: Coefficient of variation; MDC: Minimum detectable change; SF: Step frequency; SL: Step length; CR: Contact ratio; FR: Flight ratio; LSS: Leg spring stiffness; VSS: Vertical Spring Stiffness; FSP: Foot strike pattern; SA: Stride angle; Pr. Ex.: Pronation excursion; MPV: Maximum pronation velocity; t<sub>(FSaMPV)</sub>: time from foot strike to maximum pronation velocity; t<sub>(MPVaMP)</sub>: time from maximum pronation velocity to maximum pronation; t<sub>(MPaTO)</sub>: time from maximum pronation to toe off; VGRF: Vertical ground reaction force; HGRF: Horizontal ground reaction force; F: Force.
